# Supplementary material
Source: PubMed Central journal article supplement (PMC7604723)
Supplement: supp_D120000672_158680_2_supp_573817_qmmmt4.pdf [file supp_D120000672_158680_2_supp_573817_qmmmt4.pdf]

Supplemental table 1: List of proteins from the Maxquant analysis of the 6 gradient fractions (named RF) for the raft t-T cell database with the calculated ratio of rafts proteins.

Supplemental table 2: List of proteins from the Maxquant analysis of the 6 gradient fractions for the raft t-T cell database with their GOCC slim name for mapping of the different compartment.

Supplemental table 3 : List of pathways and cellular location from the pathway enrichment analysis based on a Fisher's exact test with a Benjamini-Hochberg FDR calculated for each term. KEGG name and Keywords were used for the analysis.

Supplemental table 4: List of proteins from the t-T cell rafts analysis in resting (1T0, 2T0, 3T0 and 4T0) vs activating (1T15, 2T15, 3T15 and 4T15) conditions. Selected proteins "+" in green were used for the heatmap representation.
