# Supplementary material
Source: PubMed Central journal article supplement (PMC7604723)
Supplement: supp_D120000672_158680_2_supp_573830_qkkmt4.pdf [file supp_D120000672_158680_2_supp_573830_qkkmt4.pdf]

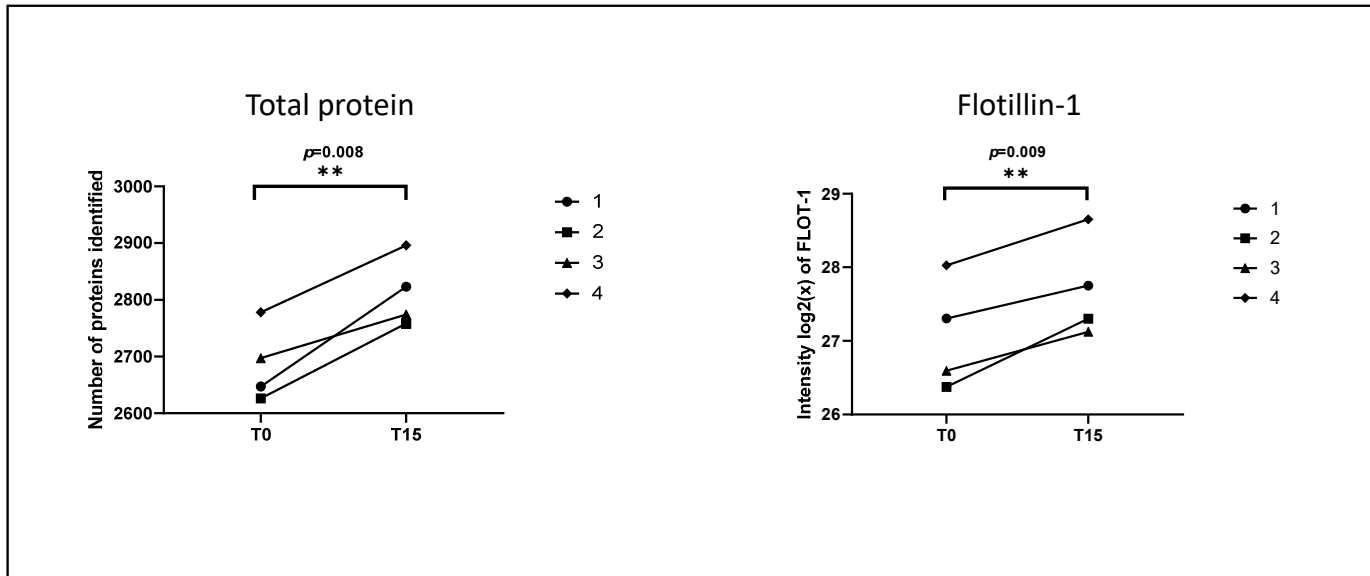

Supplemental Figure 4 : Comparative abundance of raft proteins at T0 and T15 of T cell activation. (A) Number of proteins identified in rafts from mouse T cells at two different time points (T0 and T15min) after TCR activation. Results show a significant increase of identified proteins after T cell activation for each replicate (n=4 mice). p-value was calculated using a paired t-test ( $p=0,008$ ). (B) Intensity ( $\log_2$ ) of raft marker flotillin-1 at different time points (T0 and T15min). Results show a significant increase of flotillin-1 abundance after t cell activation for each replicate (n=4 mice). p-value was calculated using a paired t-test ( $p=0,009$ ).
