# Supplementary material
Source: PubMed Central journal article supplement (PMC7604723)
Supplement: supp_D120000672_158680_2_supp_573832_qqqmt4.pdf [file supp_D120000672_158680_2_supp_573832_qqqmt4.pdf]

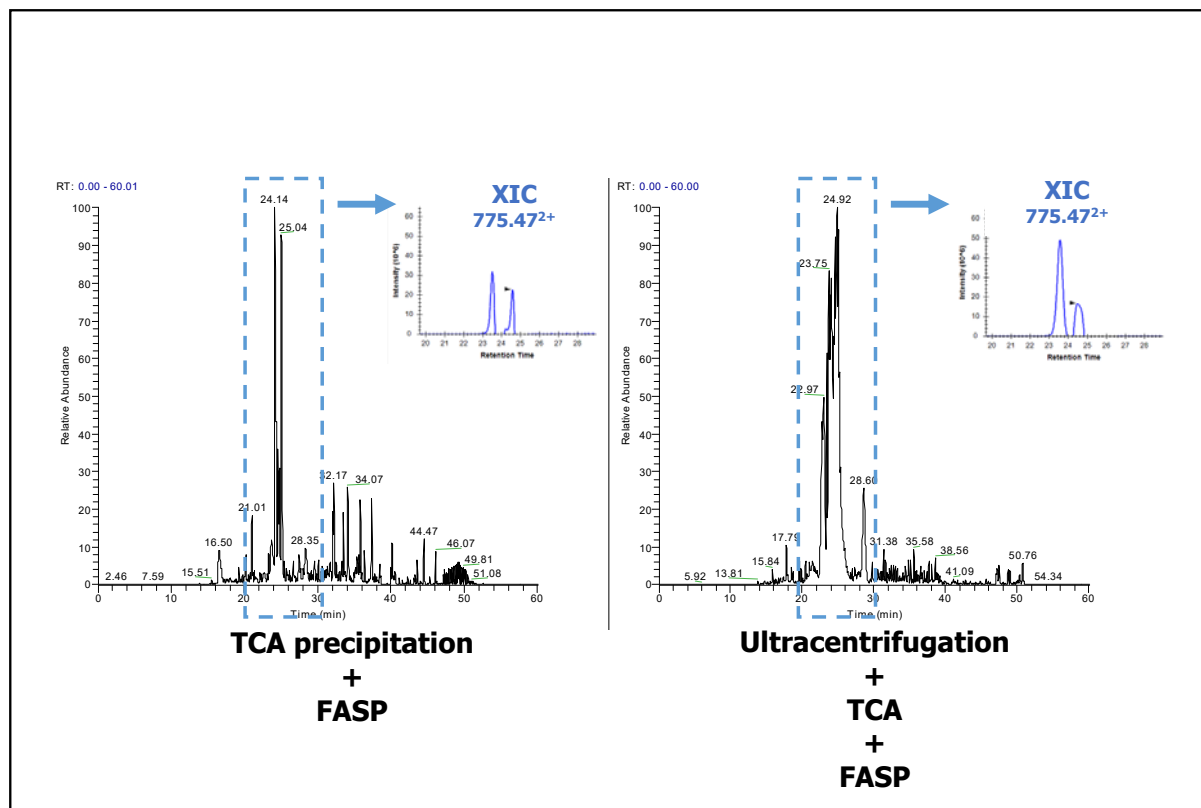

**Supplemental Figure 2 :** Different methods used on HEK lipid rafts to eliminate optiprep contamination before FASP protein digestion. Left panel: Base peak chromatogram of fraction 2 after TCA precipitation and subsequent digestion by the FASP method. ; Right panel: Base peak chromatogram of fraction 2 after ultracentrifugation, TCA precipitation and subsequent digestion by the FASP method. The extracted ion chromatograms (in blue) show the iodixanol ion (Optiprep™ , doubly charged ion  $m/z$  775,47) in both cases.
