# Supplementary material
Source: PubMed Central journal article supplement (PMC7604723)
Supplement: supp_D120000672_158680_2_supp_573833_q99mt4.pdf [file supp_D120000672_158680_2_supp_573833_q99mt4.pdf]

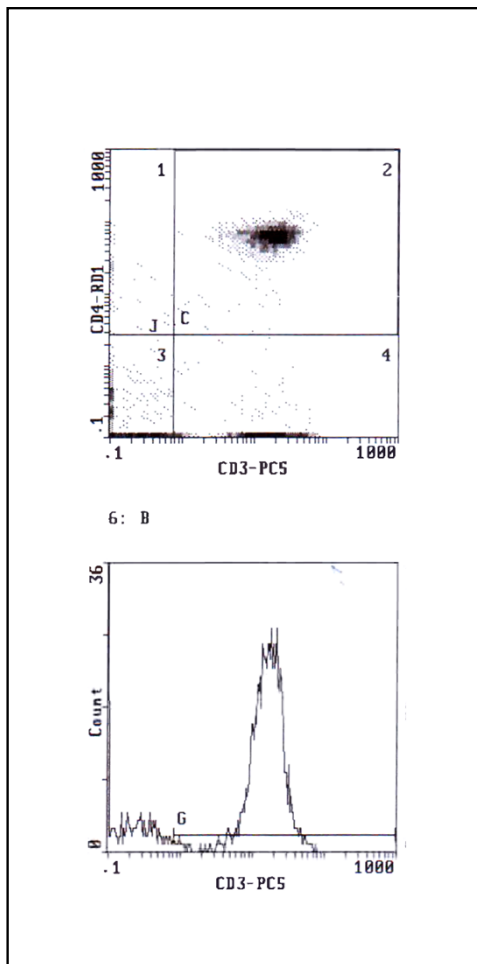

Supplemental Figure 1: Flow cytometry validation of negatively immunoselected splenocytes. Mouse splenocytes were incubated for 20 min at room temperature with anti-mouse fluorochrome-conjugated monoclonal antibodies against CD3 and CD4 (Miltenyi Biotec), fixed for 7 min with 4% paraformaldehyde and analyzed on a FACS CyAn ADP analyzer (Beckman Coulter). The upper diagram shows the distribution of double positive events. The lower diagram shows the distribution of CD3 positive events (T cells).
